# Supplementary material for: Investigating the Interplay between Tomato Leaf Curl New Delhi Virus Infection, Starch Metabolism and Antioxidant Defence System in Potato (Solanum tuberosum L.)
Source: MDPI journal article supplement (doi:10.3390/antiox12071447), 2023-07-18
Supplement: s1 [file s1]

**Table S1:** ANOVA table for interaction between varieties (Kufri Pukhraj and Kufri Bahar) and treatment (healthy control and ToLCNDV infection)for parameters viz., plant height, dry matter of potato tuber, stem diameter, Chl *a*, Chl *b*, total Chl, carotenoid, proline content, MDA content, RWC, relative electric conductivity, starch, sucrose, fructose, glucose,  $\beta$ -amylase,  $\alpha$ -amylase, phosphorylase, catalase, peroxidase, ascorbate oxidase and superoxide dismutase activity.

| S.N. | Parameters                     | Varieties | Treatment | V $\times$ T |
|------|--------------------------------|-----------|-----------|--------------|
| 1.   | Plant height                   | ns        | ***       | *            |
| 2.   | Dry matter of potato tuber     | ***       | ***       | NS           |
| 3.   | Stem diameter                  | ***       | ***       | *            |
| 4.   | Chl <i>a</i>                   | ***       | ***       | NS           |
| 5.   | Chl <i>b</i>                   | ***       | ***       | NS           |
| 6.   | Total chl                      | ***       | ***       | NS           |
| 7.   | Carotenoid                     | ***       | ***       | NS           |
| 8.   | Proline content                | ***       | ***       | ***          |
| 9.   | MDA content                    | ***       | ***       | **           |
| 10.  | Leaf relative water content    | ***       | ***       | *            |
| 11.  | Relative electric conductivity | ***       | ***       | *            |
| 12.  | Starch content                 | ***       | ***       | **           |
| 13.  | Sucrose content                | *         | ***       | NS           |
| 14.  | Fructose content               | ns        | **        | ***          |
| 15.  | Glucose content                | *         | ***       | ***          |
| 16.  | $\beta$ -amylase               | ns        | ***       | ***          |
| 17.  | $\alpha$ -amylase              | ns        | ***       | ***          |
| 18.  | Phosphorylase                  | ***       | ***       | NS           |
| 19.  | Catalase activity              | **        | ***       | NS           |
| 20.  | Peroxidase activity            | ***       | ***       | NS           |
| 21.  | Ascorbate peroxidase activity  | ***       | ***       | NS           |
| 22.  | Superoxide dismutase           | ***       | ***       | ***          |

ns: Not Significant ( $p > 0.05$ ), \*significant at  $p < 0.05$ , \*\*significant at  $p < 0.01$ , \*\*\* significant at  $p < 0.001$ .

**Table S2:** Tukey multiple comparison test for plant height of Kufri Pukraj and Kufri Bahar in control (healthy) and ToLCNDV infection plants

| Tukey's Multiple Comparisons Tests              | Significant? | Summary | Adjusted <i>p</i> Value |
|-------------------------------------------------|--------------|---------|-------------------------|
| Kufri Pukhraj:Control vs. Kufri Pukhraj:ToLCNDV | Yes          | ***     | <0.001                  |
| Kufri Pukhraj:Control vs. Kufri Bahar:Control   | Yes          | ***     | <0.001                  |
| Kufri Pukhraj:Control vs. Kufri Bahar:ToLCNDV   | Yes          | ***     | <0.001                  |
| Kufri Pukhraj:ToLCNDV vs. Kufri Bahar:Control   | No           | ns      | 0.074                   |
| Kufri Pukhraj:ToLCNDV vs. Kufri Bahar:ToLCNDV   | Yes          | ***     | <0.001                  |
| Kufri Bahar:Control vs. Kufri Bahar:ToLCNDV     | Yes          | ***     | <0.001                  |

ns: Not Significant ( $p > 0.05$ ), \*\*\* significant at  $p < 0.001$ .

**Table S3:** Tukey multiple comparison test for dry matter of Kufri Pukraj and Kufri Bahar in control (healthy) and ToLCNDV infection plants

| Tukey's Multiple Comparisons Tests              | Significant? | Summary | Adjusted <i>p</i> Value |
|-------------------------------------------------|--------------|---------|-------------------------|
| Kufri Pukhraj:Control vs. Kufri Pukhraj:ToLCNDV | Yes          | ***     | <0.001                  |
| Kufri Pukhraj:Control vs. Kufri Bahar:Control   | Yes          | ***     | <0.001                  |
| Kufri Pukhraj:Control vs. Kufri Bahar:ToLCNDV   | Yes          | ***     | <0.001                  |
| Kufri Pukhraj:ToLCNDV vs. Kufri Bahar:Control   | Yes          | ***     | <0.001                  |
| Kufri Pukhraj:ToLCNDV vs. Kufri Bahar:ToLCNDV   | Yes          | ***     | <0.001                  |
| Kufri Bahar:Control vs. Kufri Bahar:ToLCNDV     | Yes          | ***     | <0.001                  |

\*\*\* significant at  $p < 0.001$ .

**Table S4:** Tukey multiple comparison test for stem diameter of Kufri Pukraj and Kufri Bahar in control (healthy) and ToLCNDV infection plants

| Tukey's Multiple Comparisons Tests              | Significant? | Summary | Adjusted <i>p</i> Value |
|-------------------------------------------------|--------------|---------|-------------------------|
| Kufri Pukhraj:Control vs. Kufri Pukhraj:ToLCNDV | Yes          | ***     | <0.001                  |
| Kufri Pukhraj:Control vs. Kufri Bahar:Control   | Yes          | *       | 0.016                   |
| Kufri Pukhraj:Control vs. Kufri Bahar:ToLCNDV   | No           | ns      | 0.905                   |
| Kufri Pukhraj:ToLCNDV vs. Kufri Bahar:Control   | Yes          | ***     | <0.001                  |
| Kufri Pukhraj:ToLCNDV vs. Kufri Bahar:ToLCNDV   | Yes          | ***     | <0.001                  |
| Kufri Bahar:Control vs. Kufri Bahar:ToLCNDV     | Yes          | **      | 0.007                   |

ns: Not Significant ( $p > 0.05$ ), \* significant at  $p < 0.05$ , \*\*significant at  $p < 0.01$ , \*\*\* significant at  $p < 0.001$ .

**Table S5:** Tukey multiple comparison test for Chl a of Kufri Pukraj and Kufri Bahar in control (healthy) and ToLCNDV infection plants

| Tukey's Multiple Comparisons Tests              | Significant? | Summary | Adjusted <i>p</i> Value |
|-------------------------------------------------|--------------|---------|-------------------------|
| Kufri Pukhraj:Control vs. Kufri Pukhraj:ToLCNDV | Yes          | ***     | <0.001                  |
| Kufri Pukhraj:Control vs. Kufri Bahar:Control   | Yes          | *       | 0.033                   |
| Kufri Pukhraj:Control vs. Kufri Bahar:ToLCNDV   | Yes          | **      | 0.008                   |
| Kufri Pukhraj:ToLCNDV vs. Kufri Bahar:Control   | Yes          | ***     | <0.001                  |
| Kufri Pukhraj:ToLCNDV vs. Kufri Bahar:ToLCNDV   | Yes          | *       | 0.038                   |
| Kufri Bahar:Control vs. Kufri Bahar:ToLCNDV     | Yes          | ***     | <0.001                  |

\* significant at  $p < 0.05$ , \*\*significant at  $p < 0.01$ , \*\*\* significant at  $p < 0.001$ .

**Table S6:** Tukey multiple comparison test for Chl b of Kufri Pukraj and Kufri Bahar in control (healthy) and ToLCNDV infection plants

| Tukey's Multiple Comparisons Tests              | Significant? | Summary | Adjusted <i>p</i> Value |
|-------------------------------------------------|--------------|---------|-------------------------|
| Kufri Pukhraj:Control vs. Kufri Pukhraj:ToLCNDV | Yes          | ***     | <0.001                  |
| Kufri Pukhraj:Control vs. Kufri Bahar:Control   | Yes          | **      | 0.002                   |
| Kufri Pukhraj:Control vs. Kufri Bahar:ToLCNDV   | No           | ns      | 0.099                   |
| Kufri Pukhraj:ToLCNDV vs. Kufri Bahar:Control   | Yes          | ***     | <0.001                  |
| Kufri Pukhraj:ToLCNDV vs. Kufri Bahar:ToLCNDV   | Yes          | ***     | <0.001                  |
| Kufri Bahar:Control vs. Kufri Bahar:ToLCNDV     | Yes          | ***     | <0.001                  |

ns: Not Significant ( $p > 0.05$ ), \*\*significant at  $p < 0.01$ , \*\*\* significant at  $p < 0.001$ .

**Table S7:** Tukey multiple comparison test for total Chl of Kufri Pukraj and Kufri Bahar in control (healthy) and ToLCNDV infection plants

| Tukey's Multiple Comparisons Tests              | Significant? | Summary | Adjusted <i>p</i> Value |
|-------------------------------------------------|--------------|---------|-------------------------|
| Kufri Pukhraj:Control vs. Kufri Pukhraj:ToLCNDV | Yes          | ***     | <0.001                  |
| Kufri Pukhraj:Control vs. Kufri Bahar:Control   | Yes          | **      | 0.007                   |
| Kufri Pukhraj:Control vs. Kufri Bahar:ToLCNDV   | Yes          | **      | 0.005                   |
| Kufri Pukhraj:ToLCNDV vs. Kufri Bahar:Control   | Yes          | ***     | <0.001                  |
| Kufri Pukhraj:ToLCNDV vs. Kufri Bahar:ToLCNDV   | Yes          | **      | 0.005                   |
| Kufri Bahar:Control vs. Kufri Bahar:ToLCNDV     | Yes          | ***     | <0.001                  |

\*\*significant at  $p < 0.01$ , \*\*\* significant at  $p < 0.001$ .

**Table S8:** Tukey multiple comparison test for carotenoid content of Kufri Pukraj and Kufri Bahar in control (healthy) and ToLCNDV infection plants

| Tukey's Multiple Comparisons Tests              | Significant? | Summary | Adjusted <i>p</i> Value |
|-------------------------------------------------|--------------|---------|-------------------------|
| Kufri Pukhraj:Control vs. Kufri Pukhraj:ToLCNDV | Yes          | **      | .003                    |
| Kufri Pukhraj:Control vs. Kufri Bahar:Control   | Yes          | ***     | <.001                   |
| Kufri Pukhraj:Control vs. Kufri Bahar:ToLCNDV   | Yes          | **      | .004                    |
| Kufri Pukhraj:ToLCNDV vs. Kufri Bahar:Control   | Yes          | ***     | <.001                   |
| Kufri Pukhraj:ToLCNDV vs. Kufri Bahar:ToLCNDV   | Yes          | ***     | <.001                   |
| Kufri Bahar:Control vs. Kufri Bahar:ToLCNDV     | Yes          | ***     | <.001                   |

\*\*significant at  $p < 0.01$ , \*\*\* significant at  $p < 0.001$ .

**Table S9:** Tukey multiple comparison test for proline content of Kufri Pukraj and Kufri Bahar in control (healthy) and ToLCNDV infection plants

| Tukey's Multiple Comparisons Tests              | Significant? | Summary | Adjusted <i>p</i> Value |
|-------------------------------------------------|--------------|---------|-------------------------|
| Kufri Pukhraj:Control vs. Kufri Pukhraj:ToLCNDV | Yes          | *       | 0.02                    |
| Kufri Pukhraj:Control vs. Kufri Bahar:Control   | Yes          | ***     | <0.001                  |
| Kufri Pukhraj:Control vs. Kufri Bahar:ToLCNDV   | Yes          | **      | 0.001                   |
| Kufri Pukhraj:ToLCNDV vs. Kufri Bahar:Control   | Yes          | ***     | <0.001                  |
| Kufri Pukhraj:ToLCNDV vs. Kufri Bahar:ToLCNDV   | No           | ns      | 0.18                    |
| Kufri Bahar:Control vs. Kufri Bahar:ToLCNDV     | Yes          | ***     | <0.001                  |

ns: Not Significant ( $p > 0.05$ ), \* significant at  $p < 0.05$ , \*\*significant at  $p < 0.01$ , \*\*\* significant at  $p < 0.001$ .

**Table S10:** Tukey multiple comparison test for MDA content of Kufri Pukraj and Kufri Bahar in control (healthy) and ToLCNDV infection plants

| Tukey's Multiple Comparisons Tests              | Significant? | Summary | Adjusted <i>p</i> Value |
|-------------------------------------------------|--------------|---------|-------------------------|
| Kufri Pukhraj:Control vs. Kufri Pukhraj:ToLCNDV | Yes          | ***     | <0.001                  |
| Kufri Pukhraj:Control vs. Kufri Bahar:Control   | Yes          | **      | 0.007                   |
| Kufri Pukhraj:Control vs. Kufri Bahar:ToLCNDV   | Yes          | *       | 0.015                   |
| Kufri Pukhraj:ToLCNDV vs. Kufri Bahar:Control   | Yes          | ***     | <0.001                  |
| Kufri Pukhraj:ToLCNDV vs. Kufri Bahar:ToLCNDV   | Yes          | ***     | <0.001                  |
| Kufri Bahar:Control vs. Kufri Bahar:ToLCNDV     | Yes          | ***     | <0.001                  |

\* significant at  $p < 0.05$ , \*\*significant at  $p < 0.01$ , \*\*\* significant at  $p < 0.001$ .

**Table S11:** Tukey multiple comparison test for RWC of Kufri Pukraj and Kufri Bahar in control (healthy) and ToLCNDV infection plants

| Tukey's Multiple Comparisons Tests              | Significant? | Summary | Adjusted <i>p</i> Value |
|-------------------------------------------------|--------------|---------|-------------------------|
| Kufri Pukhraj:Control vs. Kufri Pukhraj:ToLCNDV | Yes          | ***     | <0.001                  |
| Kufri Pukhraj:Control vs. Kufri Bahar:Control   | No           | ns      | 0.288                   |
| Kufri Pukhraj:Control vs. Kufri Bahar:ToLCNDV   | Yes          | ***     | <0.001                  |
| Kufri Pukhraj:ToLCNDV vs. Kufri Bahar:Control   | Yes          | ***     | <0.001                  |
| Kufri Pukhraj:ToLCNDV vs. Kufri Bahar:ToLCNDV   | Yes          | ***     | <0.001                  |
| Kufri Bahar:Control vs. Kufri Bahar:ToLCNDV     | Yes          | ***     | <0.001                  |

ns: Not Significant ( $p > 0.05$ ), \*\*\* significant at  $p < 0.001$ .

**Table S12:** Tukey multiple comparison test for relative electric conductivity of Kufri Pukraj and Kufri Bahar in control (healthy) and ToLCNDV infection plants

| Tukey's Multiple Comparisons Tests              | Significant? | Summary | Adjusted <i>p</i> Value |
|-------------------------------------------------|--------------|---------|-------------------------|
| Kufri Pukhraj:Control vs. Kufri Pukhraj:ToLCNDV | Yes          | ***     | <0.001                  |
| Kufri Pukhraj:Control vs. Kufri Bahar:Control   | Yes          | *       | 0.019                   |
| Kufri Pukhraj:Control vs. Kufri Bahar:ToLCNDV   | Yes          | ***     | <0.001                  |
| Kufri Pukhraj:ToLCNDV vs. Kufri Bahar:Control   | Yes          | ***     | <0.001                  |
| Kufri Pukhraj:ToLCNDV vs. Kufri Bahar:ToLCNDV   | Yes          | ***     | <0.001                  |
| Kufri Bahar:Control vs. Kufri Bahar:ToLCNDV     | Yes          | ***     | <0.001                  |

\* significant at  $p < 0.05$ , \*\*\* significant at  $p < 0.001$ .

**Table S13:** Tukey multiple comparison test for starch content of Kufri Pukraj and Kufri Bahar in control (healthy) and ToLCNDV infection plants

| Tukey's Multiple Comparisons Tests              | Significant? | Summary | Adjusted <i>p</i> Value |
|-------------------------------------------------|--------------|---------|-------------------------|
| Kufri Pukhraj:Control vs. Kufri Pukhraj:ToLCNDV | Yes          | ***     | <0.001                  |
| Kufri Pukhraj:Control vs. Kufri Bahar:Control   | Yes          | ***     | <0.001                  |
| Kufri Pukhraj:Control vs. Kufri Bahar:ToLCNDV   | Yes          | ***     | <0.001                  |
| Kufri Pukhraj:ToLCNDV vs. Kufri Bahar:Control   | Yes          | ***     | <0.001                  |
| Kufri Pukhraj:ToLCNDV vs. Kufri Bahar:ToLCNDV   | No           | ns      | 0.897                   |
| Kufri Bahar:Control vs. Kufri Bahar:ToLCNDV     | Yes          | ***     | <0.001                  |

ns: Not Significant ( $p > 0.05$ ), \*\*\* significant at  $p < 0.001$ .

**Table S14:** Tukey multiple comparison test for sucrose content of Kufri Pukraj and Kufri Bahar in control (healthy) and ToLCNDV infection plants

| Tukey's Multiple Comparisons Tests              | Significant? | Summary | Adjusted <i>p</i> Value |
|-------------------------------------------------|--------------|---------|-------------------------|
| Kufri Pukhraj:Control vs. Kufri Pukhraj:ToLCNDV | Yes          | **      | 0.002                   |
| Kufri Pukhraj:Control vs. Kufri Bahar:Control   | No           | ns      | 0.703                   |
| Kufri Pukhraj:Control vs. Kufri Bahar:ToLCNDV   | No           | ns      | 0.131                   |
| Kufri Pukhraj:ToLCNDV vs. Kufri Bahar:Control   | Yes          | ***     | <0.001                  |
| Kufri Pukhraj:ToLCNDV vs. Kufri Bahar:ToLCNDV   | No           | ns      | 0.058                   |
| Kufri Bahar:Control vs. Kufri Bahar:ToLCNDV     | Yes          | *       | 0.028                   |

ns: Not Significant ( $p > 0.05$ ), \* significant at  $p < 0.05$ , \*\*significant at  $p < 0.01$ , \*\*\* significant at  $p < 0.001$ .

**Table S15:** Tukey multiple comparison test for fructose content of Kufri Pukraj and Kufri Bahar in control (healthy) and ToLCNDV infection plants

| Tukey's Multiple Comparisons Tests              | Significant? | Summary | Adjusted <i>p</i> Value |
|-------------------------------------------------|--------------|---------|-------------------------|
| Kufri Pukhraj:Control vs. Kufri Pukhraj:ToLCNDV | Yes          | ***     | <0.001                  |
| Kufri Pukhraj:Control vs. Kufri Bahar:Control   | Yes          | **      | 0.006                   |
| Kufri Pukhraj:Control vs. Kufri Bahar:ToLCNDV   | Yes          | ***     | <0.001                  |
| Kufri Pukhraj:ToLCNDV vs. Kufri Bahar:Control   | Yes          | ***     | <0.001                  |
| Kufri Pukhraj:ToLCNDV vs. Kufri Bahar:ToLCNDV   | Yes          | **      | 0.002                   |
| Kufri Bahar:Control vs. Kufri Bahar:ToLCNDV     | Yes          | ***     | <0.001                  |

\*\*significant at  $p < 0.01$ , \*\*\* significant at  $p < 0.001$ .

**Table S16:** Tukey multiple comparison test for glucose content of Kufri Pukraj and Kufri Bahar in control (healthy) and ToLCNDV infection plants

| Tukey's Multiple Comparisons Tests              | Significant? | Summary | Adjusted <i>p</i> Value |
|-------------------------------------------------|--------------|---------|-------------------------|
| Kufri Pukhraj:Control vs. Kufri Pukhraj:ToLCNDV | Yes          | ***     | <0.001                  |
| Kufri Pukhraj:Control vs. Kufri Bahar:Control   | Yes          | **      | 0.004                   |
| Kufri Pukhraj:Control vs. Kufri Bahar:ToLCNDV   | Yes          | ***     | <0.001                  |
| Kufri Pukhraj:ToLCNDV vs. Kufri Bahar:Control   | Yes          | ***     | <0.001                  |
| Kufri Pukhraj:ToLCNDV vs. Kufri Bahar:ToLCNDV   | Yes          | ***     | <0.001                  |
| Kufri Bahar:Control vs. Kufri Bahar:ToLCNDV     | Yes          | ***     | <0.001                  |

\*\*significant at  $p < 0.01$ , \*\*\* significant at  $p < 0.001$ .

**Table S17:** Tukey multiple comparison test for  $\beta$ -amylase of Kufri Pukraj and Kufri Bahar in control (healthy) and ToLCNDV infection plants

| Tukey's Multiple Comparisons Tests              | Significant? | Summary | Adjusted <i>p</i> Value |
|-------------------------------------------------|--------------|---------|-------------------------|
| Kufri Pukhraj:Control vs. Kufri Pukhraj:ToLCNDV | Yes          | ***     | <0.001                  |
| Kufri Pukhraj:Control vs. Kufri Bahar:Control   | Yes          | **      | 0.004                   |
| Kufri Pukhraj:Control vs. Kufri Bahar:ToLCNDV   | Yes          | ***     | <0.001                  |
| Kufri Pukhraj:ToLCNDV vs. Kufri Bahar:Control   | Yes          | ***     | <0.001                  |
| Kufri Pukhraj:ToLCNDV vs. Kufri Bahar:ToLCNDV   | Yes          | ***     | <0.001                  |
| Kufri Bahar:Control vs. Kufri Bahar:ToLCNDV     | Yes          | **      | 0.002                   |

\*\*significant at  $p < 0.01$ , \*\*\* significant at  $p < 0.001$ .

**Table S18:** Tukey multiple comparison test for  $\alpha$ -amylase of Kufri Pukraj and Kufri Bahar in control (healthy) and ToLCNDV infection plants

| Tukey's Multiple Comparisons Tests              | Significant? | Summary | Adjusted <i>p</i> Value |
|-------------------------------------------------|--------------|---------|-------------------------|
| Kufri Pukhraj:Control vs. Kufri Pukhraj:ToLCNDV | Yes          | ***     | <0.001                  |
| Kufri Pukhraj:Control vs. Kufri Bahar:Control   | Yes          | ***     | <0.001                  |
| Kufri Pukhraj:Control vs. Kufri Bahar:ToLCNDV   | Yes          | ***     | <0.001                  |
| Kufri Pukhraj:ToLCNDV vs. Kufri Bahar:Control   | Yes          | ***     | <0.001                  |
| Kufri Pukhraj:ToLCNDV vs. Kufri Bahar:ToLCNDV   | Yes          | *       | 0.010                   |
| Kufri Bahar:Control vs. Kufri Bahar:ToLCNDV     | Yes          | ***     | <0.001                  |

\* significant at  $p < 0.05$ , \*\*\* significant at  $p < 0.001$ .

**Table S19:** Tukey multiple comparison test for phosphorylase of Kufri Pukraj and Kufri Bahar in control (healthy) and ToLCNDV infection plants

| Tukey's Multiple Comparisons Tests              | Significant? | Summary | Adjusted <i>p</i> Value |
|-------------------------------------------------|--------------|---------|-------------------------|
| Kufri Pukhraj:Control vs. Kufri Pukhraj:ToLCNDV | Yes          | ***     | <0.001                  |
| Kufri Pukhraj:Control vs. Kufri Bahar:Control   | Yes          | **      | 0.005                   |
| Kufri Pukhraj:Control vs. Kufri Bahar:ToLCNDV   | Yes          | ***     | <0.001                  |
| Kufri Pukhraj:ToLCNDV vs. Kufri Bahar:Control   | Yes          | **      | 0.009                   |
| Kufri Pukhraj:ToLCNDV vs. Kufri Bahar:ToLCNDV   | Yes          | *       | 0.014                   |
| Kufri Bahar:Control vs. Kufri Bahar:ToLCNDV     | Yes          | ***     | <0.001                  |

\* significant at  $p < 0.05$ , \*\*significant at  $p < 0.01$ , \*\*\* significant at  $p < 0.001$ .

**Table S20:** Tukey multiple comparison test for catalase activity of Kufri Pukraj and Kufri Bahar in control (healthy) and ToLCNDV infection plants

| Tukey's Multiple Comparisons Tests              | Significant? | Summary | Adjusted <i>p</i> Value |
|-------------------------------------------------|--------------|---------|-------------------------|
| Kufri Pukhraj:Control vs. Kufri Pukhraj:ToLCNDV | Yes          | *       | 0.021                   |
| Kufri Pukhraj:Control vs. Kufri Bahar:Control   | No           | ns      | 0.272                   |
| Kufri Pukhraj:Control vs. Kufri Bahar:ToLCNDV   | Yes          | ***     | <0.001                  |
| Kufri Pukhraj:ToLCNDV vs. Kufri Bahar:Control   | No           | ns      | 0.313                   |
| Kufri Pukhraj:ToLCNDV vs. Kufri Bahar:ToLCNDV   | Yes          | *       | 0.027                   |
| Kufri Bahar:Control vs. Kufri Bahar:ToLCNDV     | Yes          | **      | 0.003                   |

ns: Not Significant ( $p > 0.05$ ), \* significant at  $p < 0.05$ , \*\*significant at  $p < 0.01$ , \*\*\* significant at  $p < 0.001$ .

**Table S21:** Tukey multiple comparison test for peroxidase activity of Kufri Pukraj and Kufri Bahar in control (healthy) and ToLCNDV infection plants

| Tukey's Multiple Comparisons Tests              | Significant? | Summary | Adjusted <i>p</i> Value |
|-------------------------------------------------|--------------|---------|-------------------------|
| Kufri Pukhraj:Control vs. Kufri Pukhraj:ToLCNDV | Yes          | ***     | <0.001                  |
| Kufri Pukhraj:Control vs. Kufri Bahar:Control   | Yes          | **      | 0.002                   |
| Kufri Pukhraj:Control vs. Kufri Bahar:ToLCNDV   | Yes          | ***     | <0.001                  |
| Kufri Pukhraj:ToLCNDV vs. Kufri Bahar:Control   | Yes          | ***     | <0.001                  |
| Kufri Pukhraj:ToLCNDV vs. Kufri Bahar:ToLCNDV   | Yes          | **      | 0.005                   |
| Kufri Bahar:Control vs. Kufri Bahar:ToLCNDV     | Yes          | ***     | <0.001                  |

\*\*significant at  $p < 0.01$ , \*\*\* significant at  $p < 0.001$ .

**Table S22:** Tukey multiple comparison test for ascorbate peroxidase activity of Kufri Pukraj and Kufri Bahar in control (healthy) and ToLCNDV infection plants

| Tukey's Multiple Comparisons Tests              | Significant? | Summary | Adjusted <i>p</i> Value |
|-------------------------------------------------|--------------|---------|-------------------------|
| Kufri Pukhraj:Control vs. Kufri Pukhraj:ToLCNDV | Yes          | ***     | <0.001                  |
| Kufri Pukhraj:Control vs. Kufri Bahar:Control   | Yes          | ***     | <0.001                  |
| Kufri Pukhraj:Control vs. Kufri Bahar:ToLCNDV   | Yes          | ***     | <0.001                  |
| Kufri Pukhraj:ToLCNDV vs. Kufri Bahar:Control   | Yes          | **      | 0.007                   |
| Kufri Pukhraj:ToLCNDV vs. Kufri Bahar:ToLCNDV   | Yes          | ***     | <0.001                  |
| Kufri Bahar:Control vs. Kufri Bahar:ToLCNDV     | Yes          | ***     | <0.001                  |

\*\*significant at  $p < 0.01$ , \*\*\* significant at  $p < 0.001$ .



**Table S23:** Tukey multiple comparison test for superoxide dismutase activity of Kufri Pukraj and Kufri Bahar in control (healthy) and ToLCNDV infection plants

| Tukey's Multiple Comparisons Tests              | Significant? | Summary | Adjusted <i>p</i> Value |
|-------------------------------------------------|--------------|---------|-------------------------|
| Kufri Pukhraj:Control vs. Kufri Pukhraj:ToLCNDV | Yes          | ***     | <0.001                  |
| Kufri Pukhraj:Control vs. Kufri Bahar:Control   | Yes          | ***     | <0.001                  |
| Kufri Pukhraj:Control vs. Kufri Bahar:ToLCNDV   | Yes          | ***     | <0.001                  |
| Kufri Pukhraj:ToLCNDV vs. Kufri Bahar:Control   | No           | ns      | 0.494                   |
| Kufri Pukhraj:ToLCNDV vs. Kufri Bahar:ToLCNDV   | Yes          | ***     | <0.001                  |
| Kufri Bahar:Control vs. Kufri Bahar:ToLCNDV     | Yes          | ***     | <0.001                  |

ns: Not Significant ( $p > 0.05$ ), \*\*\* significant at  $p < 0.001$ .
